# Supplementary figures and images for: Na4Ca(CO3)3: a novel carbonate analog of borate optical materials
Source: Royal Society of Chemistry journal article supplement (doi:10.1039/c8ce00745d), 2018-01-01

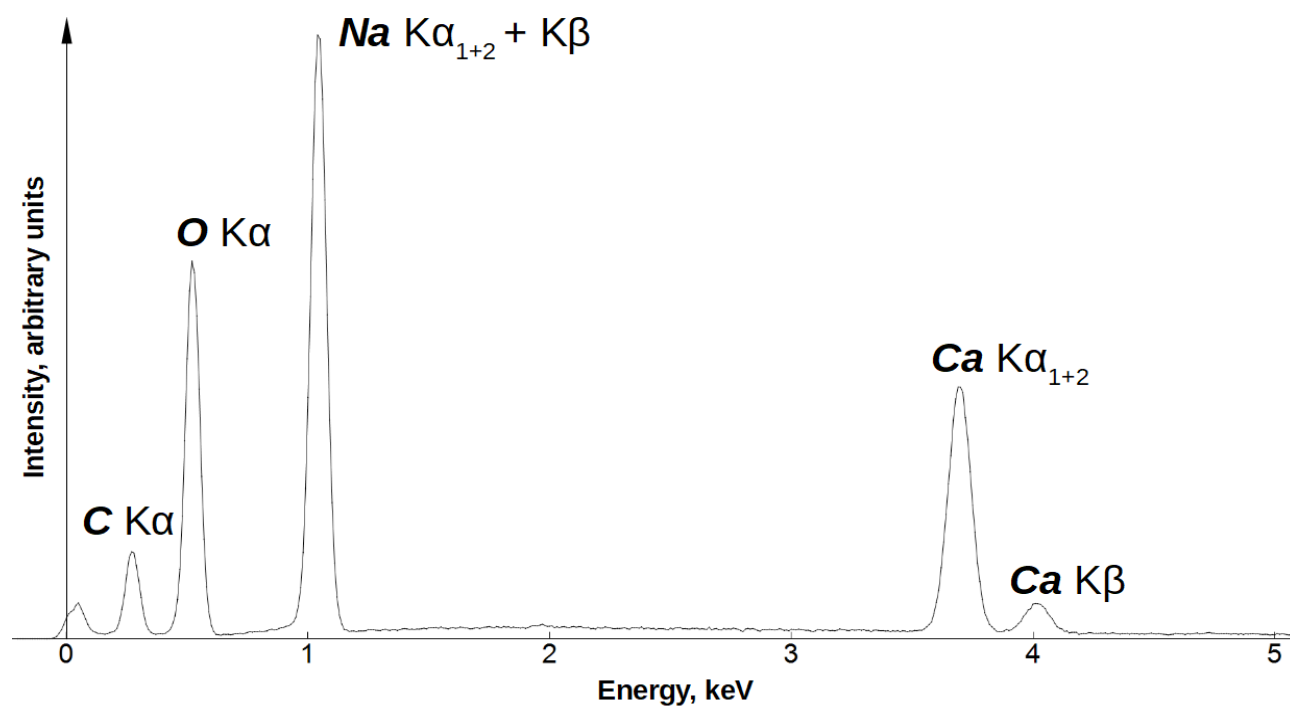

**Figure S1.** EDS spectrum of  $\text{Na}_4\text{Ca}(\text{CO}_3)_3$

Supplement: c8ce00745d1.pdf [file c8ce00745d1.pdf]
